# Supplementary material for: Evaluation of Active, Beautiful, Clean Waters Design Features in Tropical Urban Cities: A Case Study in Singapore
Source: MDPI journal article supplement (doi:10.3390/w14030468), 2022-02-04
Supplement: s1 [file s1]

## Supplementary Information

# Evaluation of Active, Beautiful, Clean Waters Design Features in Tropical Urban Cities: A Case Study in Singapore

Teck Heng Neo <sup>1</sup>, Dong Xu <sup>1</sup>, Harsha Fowdar <sup>2</sup>, David T. McCarthy <sup>2</sup>, Enid Yingru Chen <sup>3</sup>, Theresa Marie Lee <sup>3</sup>, Geok Suat Ong <sup>3</sup>, Fang Yee Lim <sup>1</sup>, Say Leong Ong <sup>1</sup> and Jiangyong Hu <sup>1,\*</sup>

<sup>1</sup> Department of Civil & Environmental Engineering, Faculty of Engineering, National University of Singapore, Block E1A, #07-01, 1 Engineering Drive 2, Singapore 117576, Singapore;

teckheng.neo@u.nus.edu (T.H.N.); erixd@nus.edu.sg (D.X.); rlimtony@gmail.com (F.Y.L.); ceeongsl@nus.edu.sg (S.L.O.)

<sup>2</sup> Cooperative Research Centre for Water Sensitive Cities, Melbourne, VIC 3800, Australia; harsha.fowdar@monash.edu (H.F.); David.McCarthy@monash.edu (D.T.M.)

<sup>3</sup> PUB, Singapore's National Water Agency, 40 Scotts Road #09-01 Environment Building, Singapore 228231, Singapore; Enid\_CHEN@pub.gov.sg (E.Y.C.); Theresa\_Marie\_LEE@pub.gov.sg (T.M.L.); ONG\_Geok\_Suat@pub.gov.sg (G.S.O.)

\* Correspondence: ceehu@nus.edu.sg

**Table S1.** Summary of monitored natural storm events.

| <b>Event Date</b>   | <b>Event ID</b> | <b>Rainfall<br/>Duration<br/>(min)</b> | <b>Total<br/>Rainfall<br/>(mm)</b> | <b>Peak Rainfall<br/>Intensity, 5-<br/>min duration<br/>(mm/h)</b> | <b>Antecedent<br/>Dry Period<br/>(hours)</b> |
|---------------------|-----------------|----------------------------------------|------------------------------------|--------------------------------------------------------------------|----------------------------------------------|
| <b>7 Mar 2018</b>   | <i>Event 1</i>  | 161                                    | 24.6                               | 67.2                                                               | 112                                          |
| <b>30 Mar 2018</b>  | <i>Event 2</i>  | 118                                    | 12.6                               | 60.0                                                               | 68                                           |
| <b>7 Apr 2018</b>   | <i>Event 3</i>  | 60                                     | 47.8                               | 117.6                                                              | 164                                          |
| <b>19 Apr 2018</b>  | <i>Event 4</i>  | 34                                     | 20.0                               | 115.2                                                              | 68                                           |
| <b>1 June 2018</b>  | <i>Event 5</i>  | 266                                    | 39.0                               | 122.4                                                              | 64                                           |
| <b>29 June 2018</b> | <i>Event 6</i>  | 237                                    | 54.0                               | 88.8                                                               | 48                                           |
| <b>19 Jul 2018</b>  | <i>Event 7</i>  | 51                                     | 24.8                               | 79.2                                                               | 272                                          |
| <b>25 Jul 2018</b>  | <i>Event 8</i>  | 38                                     | 28.6                               | 110.4                                                              | 123                                          |
| <b>4 Sep 2018</b>   | <i>Event 9</i>  | 129                                    | 54.6                               | 117.6                                                              | 260                                          |
| <b>17 Oct 2018</b>  | <i>Event 10</i> | 39                                     | 12.4                               | 57.6                                                               | 114                                          |
| <b>7 Nov 2018</b>   | <i>Event 11</i> | 124                                    | 34.4                               | 72.0                                                               | 24                                           |
| <b>18 Jan 2019</b>  | <i>Event 12</i> | 193                                    | 23.4                               | 24.0                                                               | 14                                           |

**Table S2.** Target pollutants concentration and dosing volume of challenge tests.

| <b>Water Quality Parameters</b> | <b>Singapore's Stormwater EMC 95<sup>th</sup> percentile</b> | <b>Singapore's Stormwater EMC 50<sup>th</sup> percentile</b> | <b>Worldwide stormwater pollutant levels [1,2]</b>             | <b>Targeted Influent Pollutant Concentration</b>               |
|---------------------------------|--------------------------------------------------------------|--------------------------------------------------------------|----------------------------------------------------------------|----------------------------------------------------------------|
| TSS                             | 162.97 mg/L                                                  | 42.78 mg/L                                                   | 158.49 mg/L                                                    | <b>42.78 mg/L</b> <sup>a</sup>                                 |
| TP                              | 0.26 mg/L                                                    | 0.10 mg/L                                                    | 0.35 mg/L                                                      | <b>0.26 mg/L</b>                                               |
| TN                              | 2.47 mg/L                                                    | 1.14 mg/L                                                    | 2.43 mg/L                                                      | <b>2.47 mg/L</b>                                               |
| <b>ABCWDFs</b>                  | <b>Pore Volume (m<sup>3</sup>)</b>                           | <b>1.1 x Pore Volume (m<sup>3</sup>)</b>                     | <b>90<sup>th</sup> percentile event volume (m<sup>3</sup>)</b> | <b>95<sup>th</sup> percentile event volume (m<sup>3</sup>)</b> |
| FB7                             | 12.6                                                         | <b>13.86</b>                                                 | 9.43                                                           | <b>15.27</b>                                                   |
| VS1                             | 8.4                                                          | <b>9.24</b>                                                  | <b>14.85</b> <sup>b</sup>                                      | 23.65                                                          |

<sup>a</sup> 50th percentile was chosen due to resource and time limitations. Design features generally perform well in removing TSS in the literature, with both low and high TSS inflow concentration. Topsoil was sieved and used for TSS dosing based on the particle size distribution of sediment from a sedimentation forebay of a pilot local wetland at Grove Drive, Singapore. <sup>b</sup> 90<sup>th</sup> percentile event volume is chosen for VS1 to shorten the duration of the challenge test (within 8 hours from start to end of challenge test)

**Table S3.** Number of samples for challenge test events.

| Challenge Test | Antecedent Dry Period (hours) | Actual volume of water added (m <sup>3</sup> ) <sup>a</sup> | Number of composite inflow samples | Number of outflow samples | Volume interval for outflow samples collection (L) |
|----------------|-------------------------------|-------------------------------------------------------------|------------------------------------|---------------------------|----------------------------------------------------|
| <i>VS-CT1</i>  | 168                           | 9                                                           | 6                                  | 14                        | 30 to 100                                          |
| <i>VS-CT2</i>  | 12                            | 12 <sup>b</sup>                                             | 6                                  | 13                        | 100 to 200                                         |
| <i>VS-CT3</i>  | 144                           | 15                                                          | 7                                  | 21                        | 100 to 300                                         |
| <i>VS-CT4</i>  | 144                           | 12 <sup>b</sup>                                             | 6                                  | 17                        | 100 to 200                                         |
| <i>FB-CT1</i>  | 240                           | 14                                                          | 7                                  | 21                        | 1500 to 2000                                       |
| <i>FB-CT2</i>  | 16                            | 14                                                          | 7                                  | 22                        | 1500 to 2000                                       |
| <i>FB-CT3</i>  | 12                            | 14                                                          | 7                                  | 23                        | 1500 to 2000                                       |
| <i>FB-CT4</i>  | 144                           | 15                                                          | 7                                  | 21                        | 2000                                               |

<sup>a</sup> Difference between actual volume of water added and pore volume of system is within 5% <sup>b</sup> As VS1 is unlined, extra 3 m<sup>3</sup> of water was added to take into consideration of water loss from exfiltration and ensure sufficient outflow samples for testing.

**Table S4.** Test methods for water quality parameters.

| Water Quality Parameters        | Test Methods                  | Detection Limit |
|---------------------------------|-------------------------------|-----------------|
| Total Suspended Solids (TSS)    | APHA 2540D                    | 1.0 mg/L        |
| Total Nitrogen as TN            | APHA 4500-N (C)               | 0.01 mg/L       |
| Ammonia as NH <sub>3</sub> -N   | APHA 4500-NH <sub>3</sub> (H) | 0.01 mg/L       |
| Nitrate as NO <sub>3</sub> -N   | APHA 4500-NO <sub>3</sub> (I) | 0.015 mg/L      |
| Total Phosphorus as TP          | APHA 4500-P (H)               | 0.025 mg/L      |
| Phosphate as PO <sub>4</sub> -P | APHA 4500-P (G)               | 0.025 mg/L      |

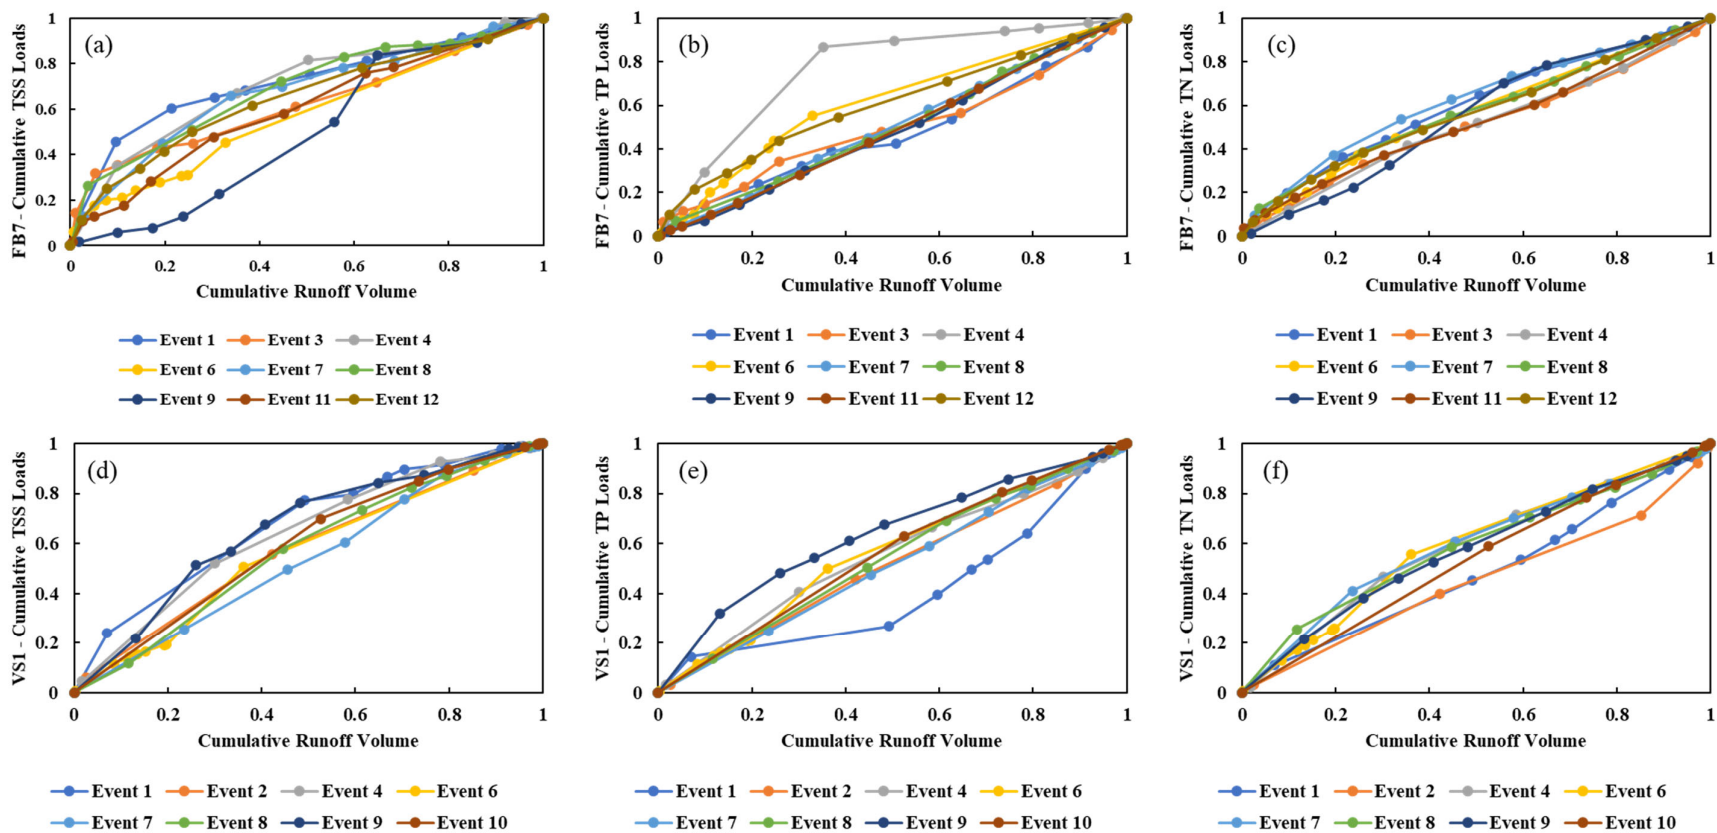

**Figure S1.** First flush (MV curve) for TSS, TP and TN of FB7 (a–c); VS1 (d–f).

## References

1. Duncan, H. (1999). Urban Stormwater Quality: A Statistical Overview. Cooperative Research Centre for Catchment Hydrology. Report 99/3.
2. Taylor, G. D., Fletcher, T. D., Wong, T. H. F., Breen, P. F., & Duncan, H. P. (2005). Nitrogen composition in urban runoff—implications for stormwater management. *Water research*, 39(10), 1982-1989. doi:<https://doi.org/10.1016/j.watres.2005.03.022>
